# Supplementary material for: In situ pyrolysis of ZIF-67 with cobalt nitrate etching for the catalytic oxidation of methane: promoting surface lattice oxygen and molecular oxygen activation
Source: Royal Society of Chemistry journal article supplement (doi:10.1039/d4ta07643e), 2024-12-03
Supplement: d4ta07643e1.pdf [file d4ta07643e1.pdf]

# **In situ pyrolysis of ZIF-67 with cobalt nitrate etching for the catalytic oxidation of methane: Promoting surface lattice oxygen and molecular oxygen activation**

Yuyang Liu,<sup>a</sup> Xiaofeng Wang,<sup>a,\*</sup> Birong Miao,<sup>a</sup> Qianji Chu,<sup>a</sup> Yanghui Mao,<sup>a</sup> Rui

Zhang,<sup>b</sup> Qingbo Li<sup>a</sup>

<sup>a</sup> Green Shipping and Carbon Neutrality Lab, College of Environmental Science and Engineering, Dalian Maritime University, Dalian 116026, China

<sup>b</sup> China Academy of Transportation Sciences, Beijing 100029, China

\* Corresponding author, email: Xiaofeng Wang, wangxf@dlnu.edu.cn

## **This file includes:**

### **1. Catalyst characterizations**

1.1. X-ray powder diffraction (XRD)

1.2. Raman

1.3. N<sub>2</sub> adsorption-desorption measurements

1.4. X-ray photoelectron spectroscopy (XPS)

1.5. Electron paramagnetic resonance (EPR)

1.6. Temperature-programmed experiments

1.7. In-situ diffuse reflectance infrared Fourier transform spectroscopy (in situ DRIFTS)

### **2. Figures and Tables**

**Figures S1.** CH<sub>4</sub> conversion of Co<sub>3</sub>O<sub>4</sub>, Co<sub>3</sub>O<sub>4</sub>-0.1 and Co<sub>3</sub>O<sub>4</sub>-C catalysts.

**Figures S2.** Relationship between etching conditions and catalyst activity as well as specific surface area.

**Figures S3.** Cycling test results of  $\text{Co}_3\text{O}_4$ -0.1 catalyst for 5 times.

**Figures S4.** Long-term testing of  $\text{Co}_3\text{O}_4$ -0.1 catalyst.

**Figure S5.** TEM images of (a)  $\text{Co}_3\text{O}_4$ , (b)  $\text{Co}_3\text{O}_4$ -0.05, (c)  $\text{Co}_3\text{O}_4$ -0.1 and (d)  $\text{Co}_3\text{O}_4$ -0.3 catalysts.

**Figure S6.** Lattice defect regions (marked with red dotted lines) of (a)  $\text{Co}_3\text{O}_4$ -0.05, (b)  $\text{Co}_3\text{O}_4$ -0.1 and (c)  $\text{Co}_3\text{O}_4$ -0.3 catalyst.

**Figure S7.** Relationship between etching conditions and catalyst activity as well as strength of Co-O bonds.

**Figure S8.** XRD spectra of  $\text{Co}_3\text{O}_4$ -0.1 catalyst before and after the long-term test.

**Figure S9.** Raman spectra of  $\text{Co}_3\text{O}_4$ -0.1 catalyst before and after the long-term test.

**Figure S10.** XPS full spectra of all catalysts.

**Figure S11.**  $\text{H}_2$ , CO and  $\text{H}_2\text{O}$  signals from  $\text{CH}_4$ -TPR of  $\text{Co}_3\text{O}_4$  and  $\text{Co}_3\text{O}_4$ -0.1 catalysts.

**Figure S12.**  $\text{O}_2$ -TPD profiles of all catalysts.

**Table S1.** Performance comparison with other catalysts for  $\text{CH}_4$  oxidation.

**Table S2.** Physical and chemical properties of prepared  $\text{Co}_3\text{O}_4$  catalysts.

## **1. Catalyst Characterizations**

### **1.1. X-ray powder diffraction (XRD)**

XRD was performed on a Panalytical X'Pert Pro diffractometer using Cu-K $\alpha$  radiation source. The data were collected from 10 to 90° with a scanning speed of 5°/min at room temperature. Crystal size was calculated as Scherrer equation:

$D = \frac{0.89\lambda}{\beta \cos\theta}$ , where  $\lambda$ ,  $\beta$  and  $\theta$  denoted the X-ray wavelength (nm), full width at half maximum and diffraction angle, respectively.

### **1.2. Raman**

Raman spectra was measured on a Horiba LabRAM HR Evolution Raman Spectrometer under ambient condition using a laser with a wavelength of 532 nm. The spectra were recorded using a scan number from 100 to 800 cm<sup>-1</sup>.

### **1.3. N<sub>2</sub> adsorption-desorption measurements**

Before analysis, the samples were degassed at 300 °C for 8 h. Nitrogen adsorption and desorption isotherms of substrates and catalysts were obtained at -196 °C. The surface area and the total pore volume of the samples were calculated using the Brunauer-Emmett-Teller (BET) method in a relative pressure range of 0.05-0.25 and the adsorption quantity at a relative pressure of P/P<sub>0</sub> = 1.0, respectively.

### **1.4. X-ray photoelectron spectroscopy (XPS)**

XPS was conducted on a Thermo Scientific K-Alpha spectrometer using a

monochromatic Al K $\alpha$  radiation ( $h\nu = 1486.6$  eV), at a take-off angle of 0°. The survey scan spectra, Co 2p, and O 1s core level spectra were recorded at a pass energy of 30 eV. Correction of the charge effect was made with the C1s peak at 284.8 eV.

### **1.5. Electron paramagnetic resonance (EPR)**

EPR spectra was obtained on an electron paramagnetic resonance spectrometer (Bruker, E500) at room temperature.

### **1.6. Temperature-programmed experiments**

Temperature-programmed experiments was carried out on the BJBUILDER PCA1200 Chemisorbent Analyzer equipment using the thermal conductivity detector (TCD) as a detector.

For H<sub>2</sub>-TPR, 0.05 g sample was firstly pretreated at 300 °C for 1 h with a pure Ar flow (30 mL/min), and then cooled to 50 °C. 10 vol% H<sub>2</sub>/Ar with a flow rate of 30 mL/min as the reducing gas was introduced and the reactor was heated from 50 °C to 700 °C with a rate of 10 °C/min.

For O<sub>2</sub>-TPD, 0.1g sample was pretreated by pure Ar (30 mL/min) at 400 °C for 30 min and then the sample was treated with pure O<sub>2</sub> for 30 min and cool down to 50 °C in pure Ar. After that, sample was heated from 50 to 950 °C with a rate of 10 °C/min.

For Ar-TPD, 0.1g sample was pretreated by pure Ar or 2 vol% CH<sub>4</sub> (30 mL/min) at 300 °C for 30 min and then the sample was cooling down to 50 °C in pure Ar. After

that, sample was heated from 50 to 950 °C with a rate of 10 °C/min.

For CH<sub>4</sub>-TPR, 0.1g sample was pretreated at 200 °C for 1 h with a pure Ar flow (30 mL/min), and then cooled to 50 °C. 10 vol% CH<sub>4</sub>/Ar with a flow rate of 30 mL/min as the reducing gas was introduced and the reactor was heated from 50 °C to 550 °C with a rate of 10 °C/min.

### **1.7. In-situ diffuse reflectance infrared Fourier transform spectroscopy (in situ DRIFTS)**

In-situ DRIFTS measurements were collected with a Nicolet Nexus spectrometer equipped with a liquid nitrogen-cooled MCT detector. The catalyst was pretreated in N<sub>2</sub> (50 mL/min) at 200 °C for 30 min and then cooled to 50 °C. Next, the flow gas was switched to 1 vol% CH<sub>4</sub> and 99 vol% N<sub>2</sub> and the spectra were recorded from 50 to 400 °C. Then 20 vol% O<sub>2</sub> was introduced into the system and the spectra were recorded from 1 to 25 min at 400 °C.

## 2. Figures and Tables

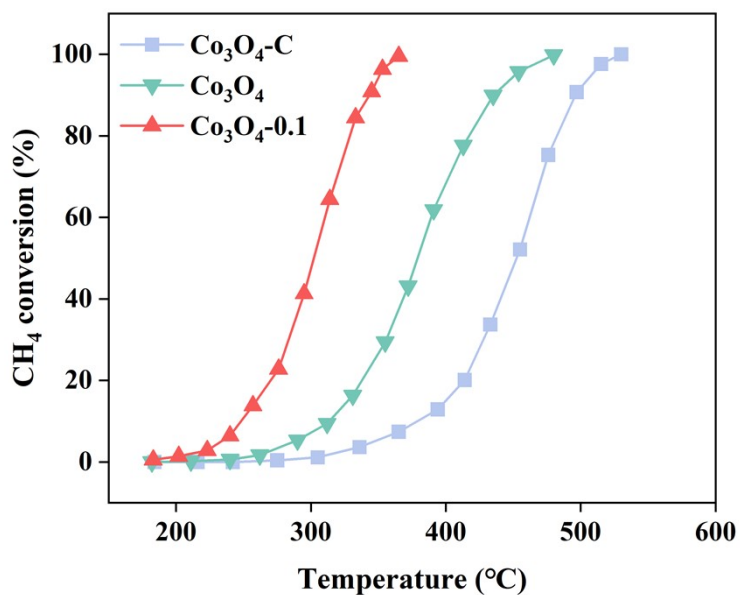

**Figure S1.** CH<sub>4</sub> conversion (reaction condition: 1 vol% CH<sub>4</sub>, 20 vol% O<sub>2</sub> and 79 vol% N<sub>2</sub>, WHSV= 30,000 mL·g<sup>-1</sup>·h<sup>-1</sup>) of Co<sub>3</sub>O<sub>4</sub>, Co<sub>3</sub>O<sub>4</sub>-0.1 and Co<sub>3</sub>O<sub>4</sub>-C catalysts.

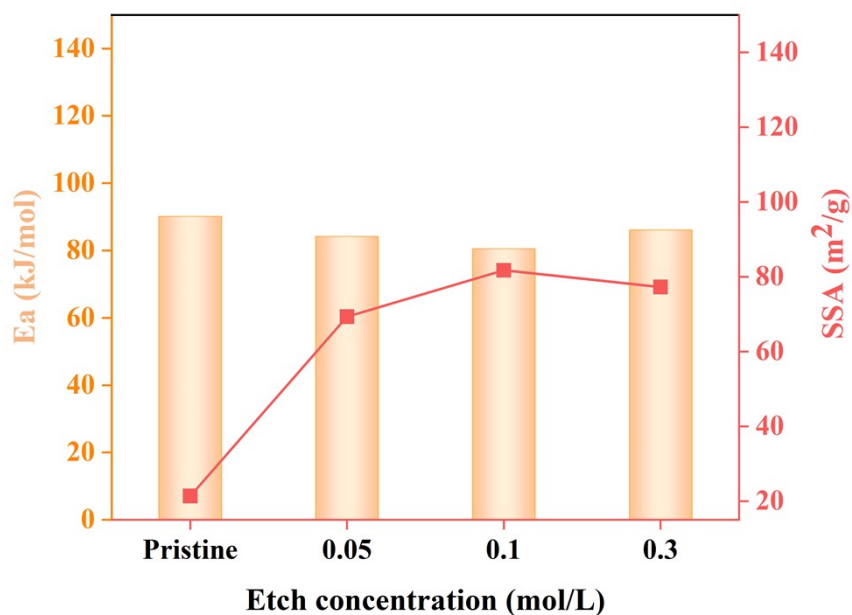

**Figure S2.** Relationship between etching conditions and catalyst activity as well as specific surface area.

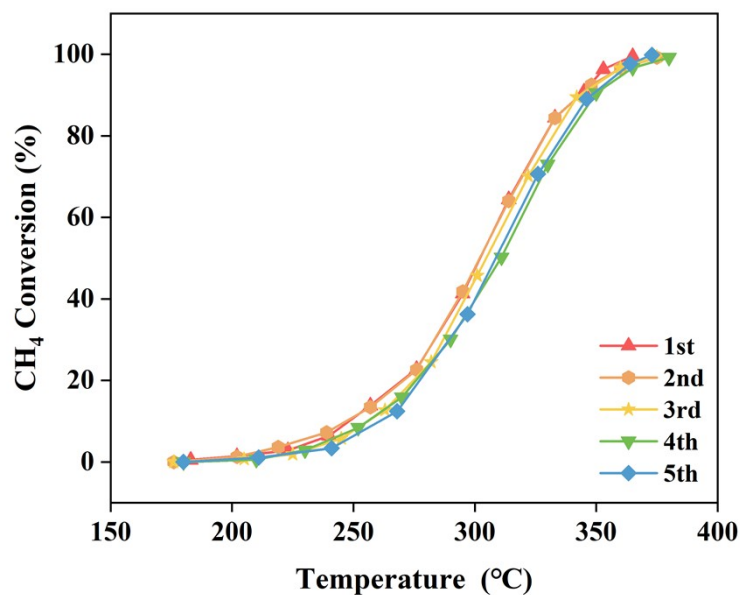

**Figure S3.** Cycling test results of  $\text{Co}_3\text{O}_4\text{-}0.1$  catalyst for 5 times (reaction condition: 1 vol%  $\text{CH}_4$ , 20 vol%  $\text{O}_2$  and  $\text{N}_2$  as a balance gas,  $\text{WHSV} = 30,000 \text{ mL}\cdot\text{g}^{-1}\cdot\text{h}^{-1}$ ).

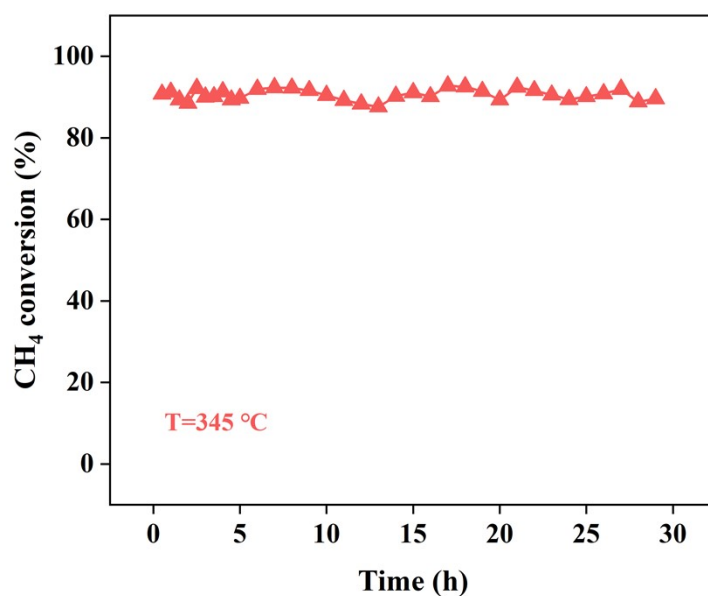

**Figure S4.** Long-term testing of  $\text{Co}_3\text{O}_4\text{-}0.1$  catalyst (reaction condition: 1 vol%  $\text{CH}_4$ , 20 vol%  $\text{O}_2$  and 79 vol%  $\text{N}_2$ ,  $\text{WHSV} = 30,000 \text{ mL}\cdot\text{g}^{-1}\cdot\text{h}^{-1}$ ) of  $\text{Co}_3\text{O}_4$ ,  $\text{Co}_3\text{O}_4\text{-}0.1$  and  $\text{Co}_3\text{O}_4\text{-C}$  catalysts.

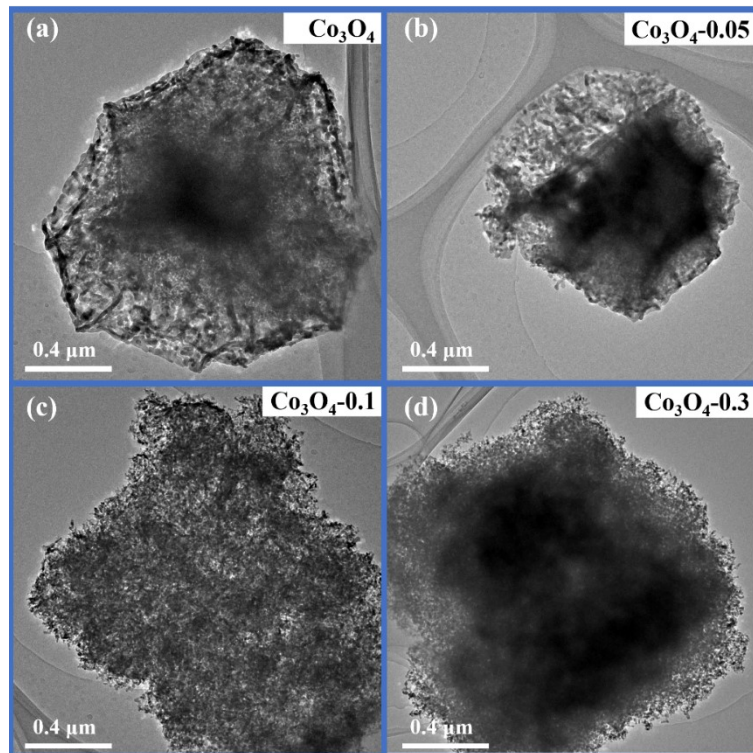

**Figure S5.** TEM images of (a)  $\text{Co}_3\text{O}_4$ , (b)  $\text{Co}_3\text{O}_4\text{-0.05}$ , (c)  $\text{Co}_3\text{O}_4\text{-0.1}$  and (d)  $\text{Co}_3\text{O}_4\text{-0.3}$  catalysts.

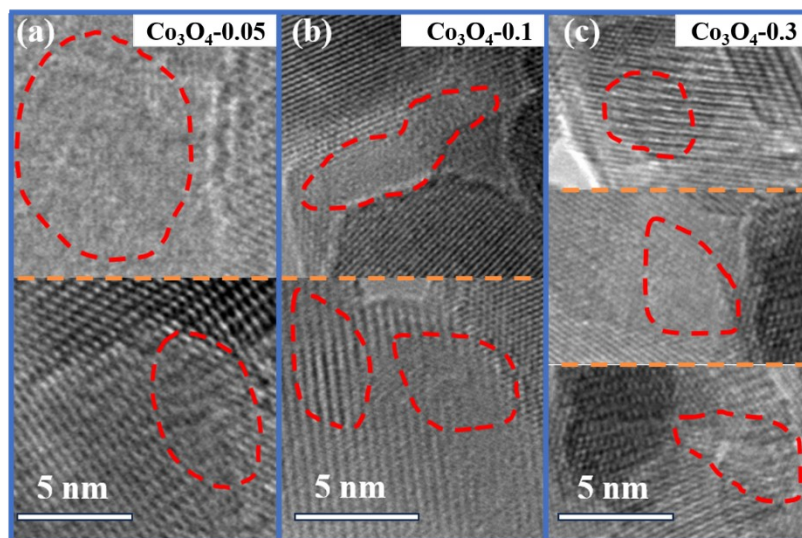

**Figure S6.** Lattice defect regions (marked with red dotted lines) of (a)  $\text{Co}_3\text{O}_4\text{-0.05}$ , (b)  $\text{Co}_3\text{O}_4\text{-0.1}$  and (c)  $\text{Co}_3\text{O}_4\text{-0.3}$  catalyst.



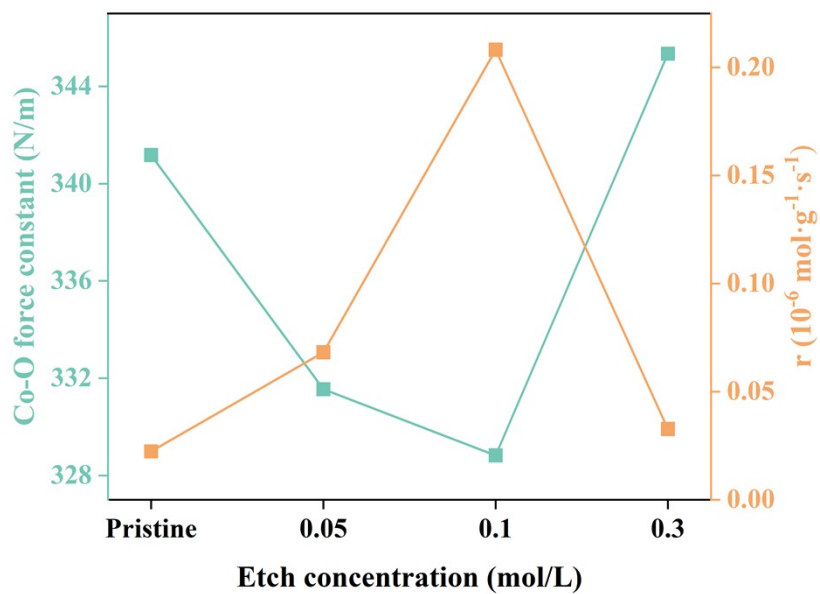

**Figure S7.** Relationship between etching conditions and catalyst activity as well as strength of Co-O bonds.

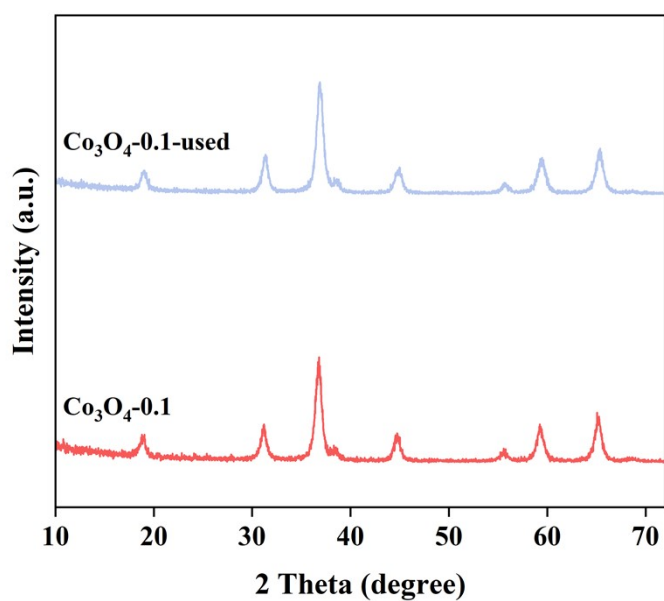

**Figure S8.** XRD spectra of  $\text{Co}_3\text{O}_4\text{-0.1}$  catalyst before and after the long-term test.

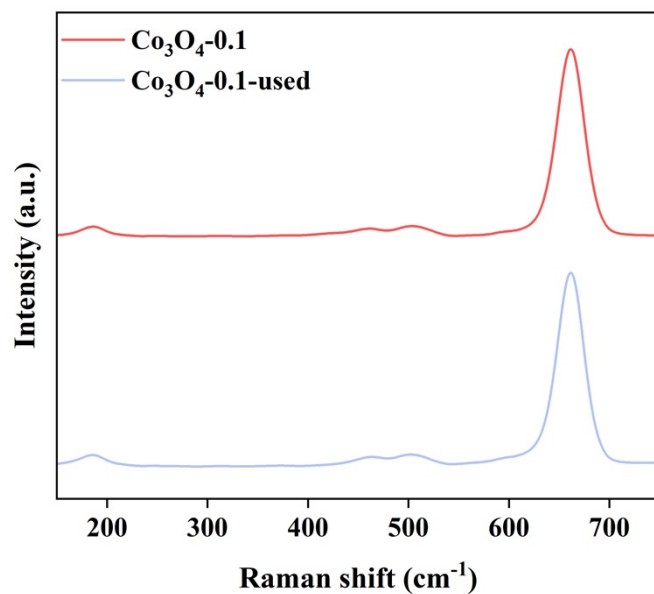

**Figure S9.** Raman spectra of Co<sub>3</sub>O<sub>4</sub>-0.1 catalyst before and after the long-term test.

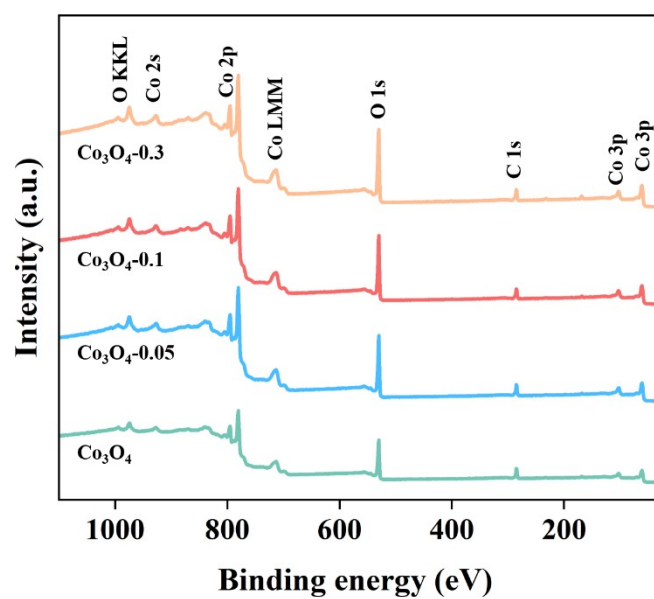

**Figure S10.** XPS full spectra of all catalysts.

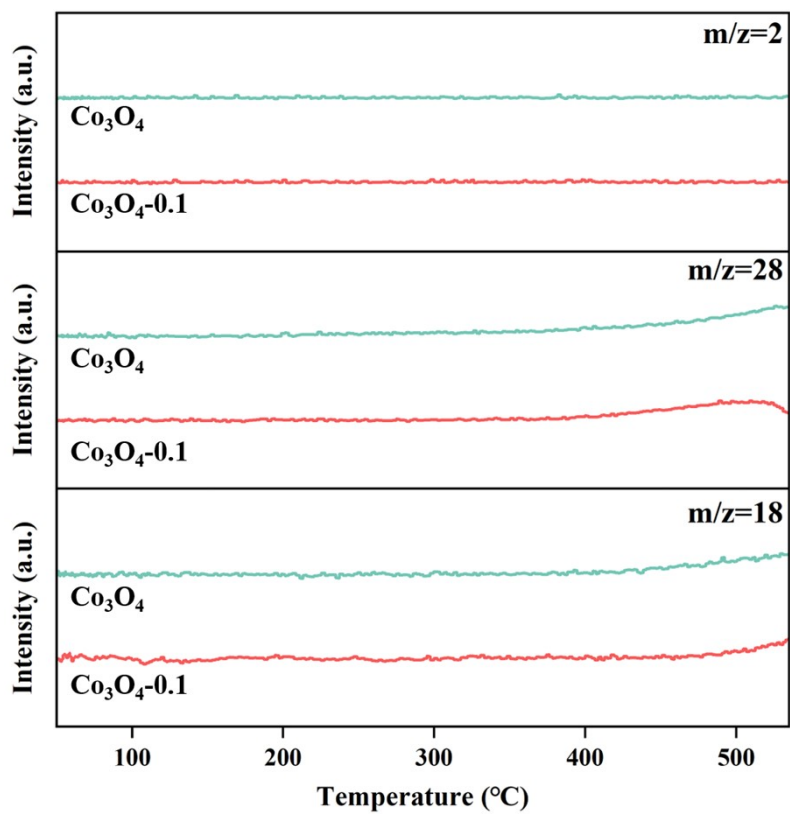

**Figure S11.** H<sub>2</sub>, CO and H<sub>2</sub>O signals from CH<sub>4</sub>-TPR of Co<sub>3</sub>O<sub>4</sub> and Co<sub>3</sub>O<sub>4</sub>-0.1 catalysts.

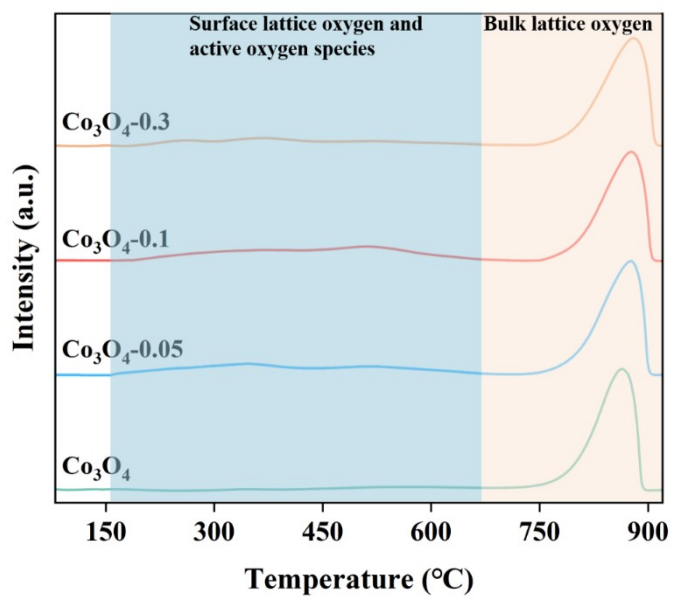

**Figure S12.** O<sub>2</sub>-TPD profiles of all catalysts.

**Table S1.** Performance comparison with other catalysts for CH<sub>4</sub> oxidation.

| Catalysts                                                                                          | T <sub>90</sub> (°C) | Reaction condition                                                                                                                 | Ref.             |
|----------------------------------------------------------------------------------------------------|----------------------|------------------------------------------------------------------------------------------------------------------------------------|------------------|
| Co <sub>3</sub> O <sub>4</sub> -r                                                                  | 385                  | 1 vol% CH <sub>4</sub> and 99 vol% air, SV = 30,000 mL g <sup>-1</sup> h <sup>-1</sup>                                             | [1]              |
| Co <sub>3</sub> O <sub>4</sub> -9.0                                                                | 413                  | 0.5 vol% CH <sub>4</sub> , 8 O <sub>2</sub> vol% and balanced with N <sub>2</sub> , SV = 18,000 mL g <sup>-1</sup> h <sup>-1</sup> | [2]              |
| La <sub>0.85</sub> Ce <sub>0.15</sub> CoO <sub>3</sub>                                             | 486                  | 0.5 vol% CH <sub>4</sub> , 8 O <sub>2</sub> vol% and balanced with N <sub>2</sub> , SV = 30,000 mL g <sup>-1</sup> h <sup>-1</sup> | [3]              |
| Co <sub>3</sub> O <sub>4</sub> /H-ZSM-5                                                            | 409                  | 1 vol% CH <sub>4</sub> and 99 vol% air, SV = 20,000 mL g <sup>-1</sup> h <sup>-1</sup>                                             | [4]              |
| Co <sub>3</sub> O <sub>4</sub> /La <sub>2</sub> O <sub>2</sub> CO <sub>3</sub> /LaCoO <sub>3</sub> | 476                  | 1 vol% CH <sub>4</sub> and 99 vol% air, SV = 15,000 mL g <sup>-1</sup> h <sup>-1</sup>                                             | [5]              |
| 5 wt% La-Co <sub>3</sub> O <sub>4</sub>                                                            | 661                  | 2 vol% CH <sub>4</sub> and 98 vol% air, SV = 6,000 mL g <sup>-1</sup> h <sup>-1</sup>                                              | [6]              |
| 1 wt% Pd/Co <sub>3</sub> O <sub>4</sub>                                                            | 361                  | 1 vol% CH <sub>4</sub> , 20 O <sub>2</sub> vol% and balanced with N <sub>2</sub> , SV = 30,000 mL g <sup>-1</sup> h <sup>-1</sup>  | [7]              |
| <b>Co<sub>3</sub>O<sub>4</sub>-0.1</b>                                                             | <b>345</b>           | <b>1 vol% CH<sub>4</sub>, 20 vol% O<sub>2</sub> in N<sub>2</sub>, SV = 30,000 mL g<sup>-1</sup> h<sup>-1</sup></b>                 | <b>This work</b> |

**Table S2.** Physical and chemical properties of prepared Co<sub>3</sub>O<sub>4</sub> catalysts.

| Sample                               | Crystal size <sup>a</sup><br>(nm) | Surface area <sup>b</sup><br>(m <sup>2</sup> g <sup>-1</sup> ) | Pore diameter <sup>c</sup><br>(nm) | Co <sup>3+</sup> /Co <sup>2+</sup> <sup>d</sup><br>(%) | O <sub>ads</sub> /O <sub>latt</sub> <sup>d</sup><br>(%) |
|--------------------------------------|-----------------------------------|----------------------------------------------------------------|------------------------------------|--------------------------------------------------------|---------------------------------------------------------|
| Co <sub>3</sub> O <sub>4</sub>       | 23.8                              | 21.3                                                           | 9.5                                | 2.04                                                   | 0.34                                                    |
| Co <sub>3</sub> O <sub>4</sub> -0.05 | 11.1                              | 69.3                                                           | 2.2                                | 2.5                                                    | 0.39                                                    |
| Co <sub>3</sub> O <sub>4</sub> -0.1  | 11.2                              | 81.7                                                           | 33.0                               | 2.63                                                   | 0.42                                                    |
| Co <sub>3</sub> O <sub>4</sub> -0.3  | 11.0                              | 86.1                                                           | 33.2                               | 2.17                                                   | 0.5                                                     |

<sup>a</sup> Crystal size obtained from the results of XRD;

<sup>b</sup> Calculated by BET method;

<sup>c</sup> Calculated by BJH method;

<sup>d</sup> Calculated based on XPS results.

## References

[1] Yihang Jiang, Wenzhi Li, Kun Chen, Xia Zhang, Changcheng Shen, and Liang Yuan, A rod-like  $\text{Co}_3\text{O}_4$  with high efficiency and large specific surface area for lean methane catalytic oxidation. *Molecular Catalysis*, 2022. **522**: p. 112229.

[2] Yifan Zheng, Yan Liu, Huan Zhou, Wanzhen Huang, and Zhiying Pu, Complete combustion of methane over  $\text{Co}_3\text{O}_4$  catalysts: Influence of pH values. *Journal of Alloys and Compounds*, 2018. **734**: p. 112-120.

[3] Lei Jiang, Danyang Li, Guixian Deng, Chunqiang Lu, Linan Huang, Zhiqiang Li, Haiwen Xu, Xing Zhu, Hua Wang, and Kongzhai Li, Design of hybrid  $\text{La}_{1-x}\text{Ce}_x\text{CoO}_{3-\delta}$  catalysts for lean methane combustion via creating active Co and Ce species. *Chemical Engineering Journal*, 2023. **456**: p. 141054.

[4] Chao Fan, Zhiwei Wu, Zhikai Li, Zhangfeng Qin, Huaqing Zhu, Mei Dong, Jianguo Wang, and Weibin Fan, Controllable preparation of ultrafine  $\text{Co}_3\text{O}_4$  nanoparticles on H-ZSM-5 with superior catalytic performance in lean methane combustion. *Fuel*, 2023. **334**: p. 126815.

[5] Yahan Wang, Saifei Wang, Jingyu Bai, Long Zhang, Shiguang Zhao, Jiguang Deng, Xiaolong Tang, and Erhong Duan, Structural evolution in  $\text{LaCoO}_3$  by polyol treatment: Highly active and resistant  $\text{Co}_3\text{O}_4/\text{La}_2\text{O}_2\text{CO}_3/\text{LaCoO}_3$

heterostructure catalysts for CH<sub>4</sub> oxidation. *Applied Catalysis B: Environmental*, 2023. **338**: p. 123079.

[6] Yulong Wang, Yating Lv, Yijia Cao, Jinyan Xiao, Pengfei Tu, Lei Yang, Shengwei Tang, and Wenxiang Tang, In-situ reconstruction of LaCoO<sub>3</sub>-Co<sub>3</sub>O<sub>4</sub> hetero-interface over lanthanum modified Co<sub>3</sub>O<sub>4</sub> nanocatalyst for improved catalytic activity and sintering resistance in methane combustion. *Catalysis Today*, 2024. **435**: p. 114697.

[7] Juxia Xiong, Kang Wu, Ji Yang, Peng Liu, Linghe Song, Jing Zhang, Mingli Fu, Liming Chen, Haomin Huang, Junliang Wu, and Daiqi Ye, The effect of existence states of PdO<sub>x</sub> supported by Co<sub>3</sub>O<sub>4</sub> nanoplatelets on catalytic oxidation of methane. *Applied Surface Science*, 2021. **539**: p. 148211.
